# Supplementary material
Source: Springer Nature journal article supplement (https://www.springermedizin.de/resource/supplementary/12889_2010_2391_MOESM2_ESM.pdf/9485648)

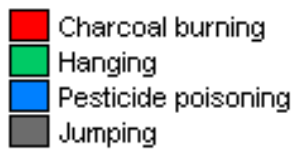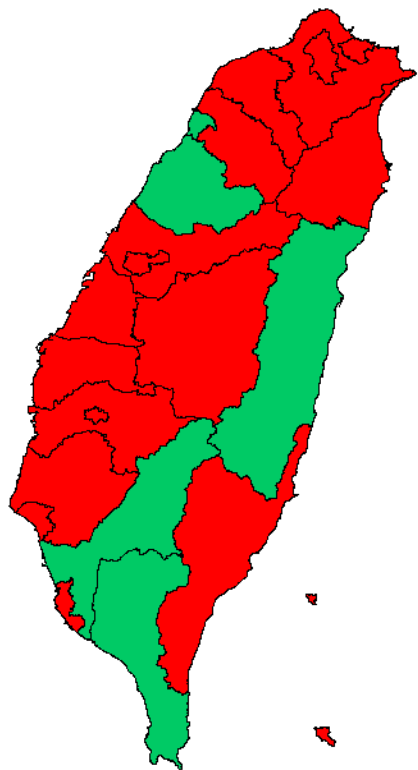

15-24 yrs

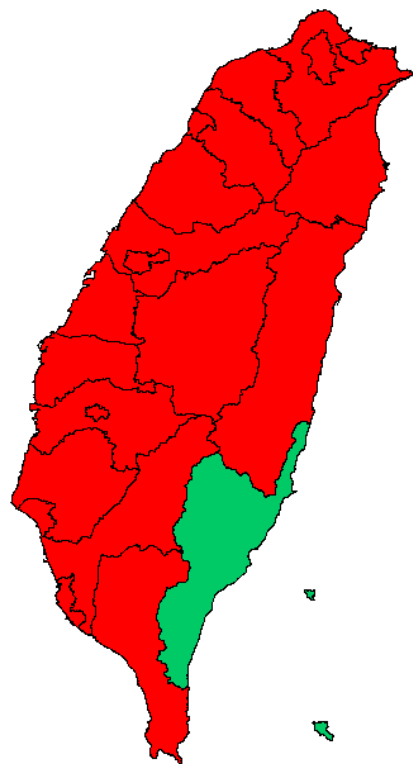

25-44 yrs

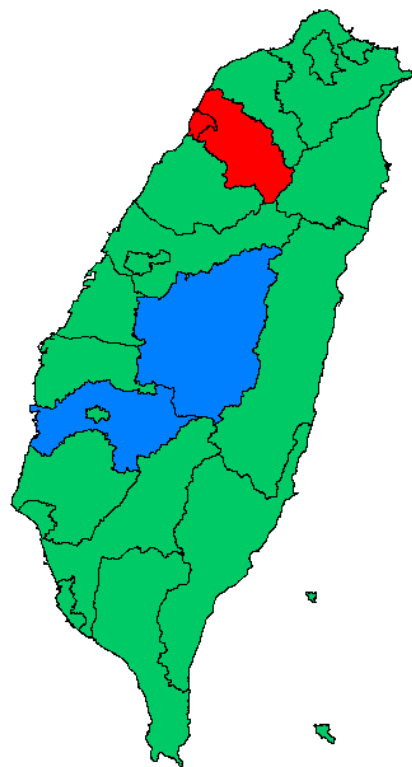

45-64 yrs

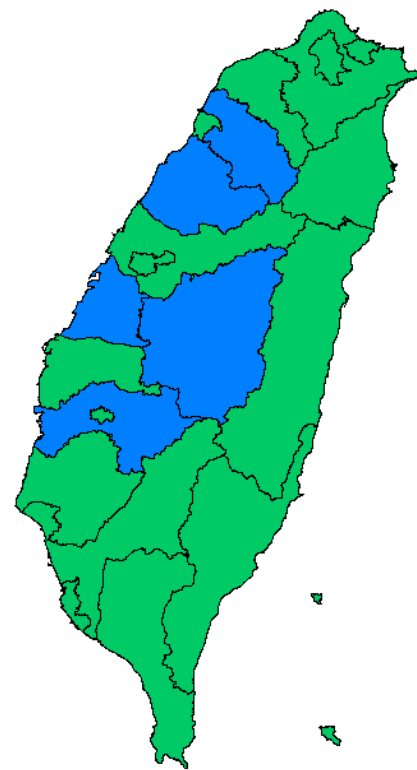

65+ yrs

Supplement: MOESM2 [file 9485648]
